# Supplementary figures and images for: The Upper Midwest Health Study: gliomas and occupational exposure to chlorinated solvents
Source: HighWire-hosted journal article supplement (doi:10.1136/oemed-2011-100588), 2012-10-26

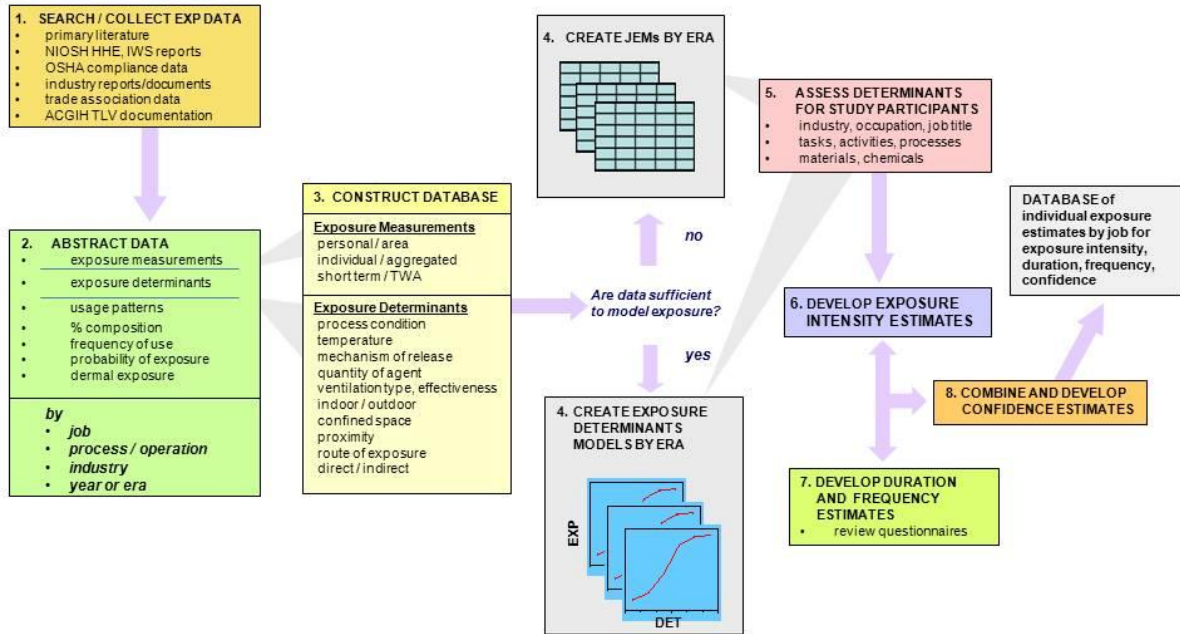

Supplement Figure 1: Exposure Assessment

Supplement: oemed-2011-100588supp_figure.pdf [file oemed-2011-100588supp_figure.pdf]
